# Supplementary material for: Copper Cobalt Sulfide Structures Derived from MOF Precursors with Enhanced Electrochemical Glucose Sensing Properties
Source: MDPI journal article supplement (doi:10.3390/nano12091394), 2022-04-19
Supplement: s1 [file s1]

## **Supporting Information**

### **Copper cobalt sulfide structures derived from MOF precursors with enhanced electrochemical glucose sensing properties**

Daojun Zhang,<sup>a\*</sup> Xiaobei Zhang,<sup>a,b</sup> Yingping Bu,<sup>a,b</sup> Jingchao Zhang,<sup>a</sup> Renchun Zhang<sup>a</sup>

<sup>a</sup> College of Chemistry and Chemical Engineering, Anyang Normal University,  
Anyang 455000, Henan, China

<sup>b</sup> College of Chemistry, Zhengzhou University, 100 Science Road, Zhengzhou  
450001, Henan, P. R. China

\* Corresponding author. Tel.: +86 372 2900040.

E-mail: zhangdj0410@sohu.com; zhangdj0410@126.com

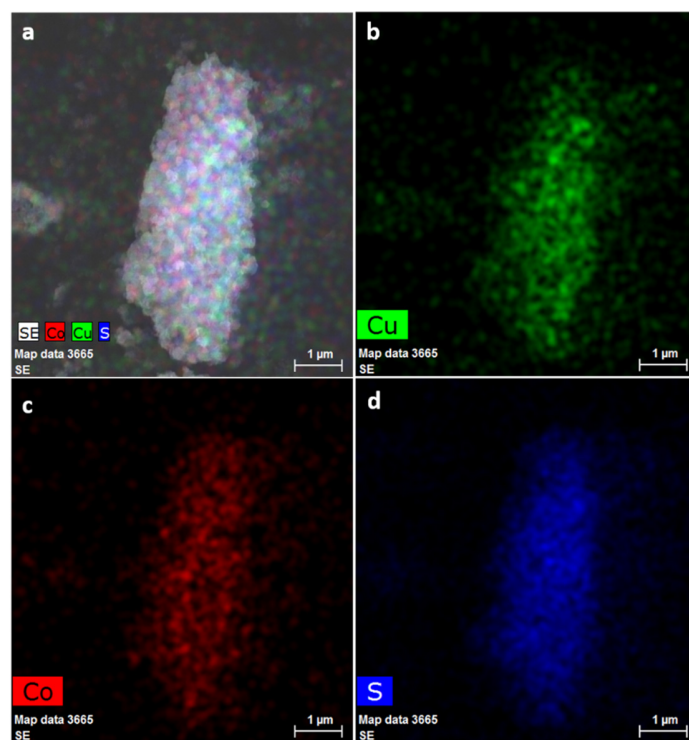

Figure S1. EDX elemental mapping images of Co-CuS-1 sample. (a) an overlap image of Cu, Co, and S for Co-CuS-1, elemental mapping of (b) Cu, (c) Co, and (d) S, respectively.

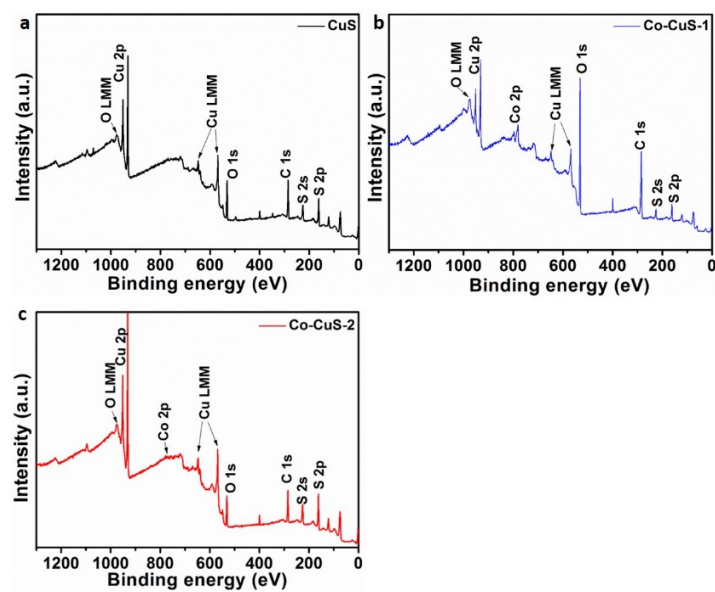

Figure S2 XPS survey spectra of (a) CuS-1, (b) Co-CuS-1 and (c) Co-CuS-2 samples.
